# Supplementary material
Source: PubMed Central journal article supplement (PMC2605166)
Supplement: NIHMS75276-supplement-1.pdf [file NIHMS75276-supplement-1.pdf]

Supplementary Table 1 Blackburn et al

Supplementary Table 1 Nearest neighbor analysis

| Rank | GENE NAME                   | DESCRIPTION                                                                            | Score    |
|------|-----------------------------|----------------------------------------------------------------------------------------|----------|
| 0    | <b>PDCD1</b>                | PDCD1:programmed cell death 1                                                          | 0        |
| 1    | <b>CCL3</b>                 | CCL3:chemokine (C-C motif) ligand 3                                                    | 0.008424 |
| 2    | <b>PTPN13</b>               | PTPN13:protein tyrosine phosphatase, non-receptor type 13                              | 0.027676 |
| 3    | <b>CASP3</b>                | CASP3:caspase 3, apoptosis-related cysteine protease                                   | 0.028392 |
| 4    | <b>CD244</b>                | CD244:CD244 natural killer cell receptor 2B4                                           | 0.039714 |
| 5    | <b>GP49A</b>                | na                                                                                     | 0.04136  |
| 6    | <b>NR4A2</b>                | NR4A2:nuclear receptor subfamily 4, group A, member 2                                  | 0.041783 |
| 7    | <b>TRG@</b>                 | TRG@:T cell receptor gamma locus                                                       | 0.049253 |
| 8    | <b>EEA1</b>                 | EEA1:early endosome antigen 1, 162kD                                                   | 0.049689 |
| 9    | <b>GP2D</b>                 | GP2D:glycerol-3-phosphate dehydrogenase 2 (mitochondrial)                              | 0.050046 |
| 10   | <b>.SEPT4</b>               | SEPT4:septin 4                                                                         | 0.050754 |
| 11   | <b>FASLG</b>                | FASLG:Fas ligand (TNF superfamily, member 6)                                           | 0.062491 |
| 12   | <b>CD160</b>                | CD160:CD160 antigen                                                                    | 0.062578 |
| 13   | <b>IFIH1</b>                | IFIH1:interferon induced with helicase C domain 1                                      | 0.063032 |
| 14   | <b>TANK</b>                 | TANK:TRAF family member-associated NFKB activator                                      | 0.06309  |
| 15   | <b>MDF1C</b>                | MDF1C:MyoD family inhibitor domain containing                                          | 0.063186 |
| 16   | <b>WBP5</b>                 | WBP5:WW domain binding protein 5                                                       | 0.064811 |
| 17   | <b>PTGER4</b>               | PTGER4:prostaglandin E receptor 4 (subtype EP4)                                        | 0.06595  |
| 18   | <b>SH2D2A</b>               | SH2D2A:SH2 domain protein 2A                                                           | 0.066017 |
| 19   | <b>4631408011RIK</b>        | na                                                                                     | 0.074308 |
| 20   | <b>NRP1</b>                 | NRP1:Neuropilin 1                                                                      | 0.074342 |
| 21   | <b>ISG20</b>                | ISG20:interferon stimulated gene 20kDa                                                 | 0.076608 |
| 22   | <b>GPR56</b>                | GPR56:G protein-coupled receptor 56                                                    | 0.077863 |
| 23   | <b>CD7</b>                  | CD7:CD7 antigen (p41)                                                                  | 0.079644 |
| 24   | <b>1110067D22RIK</b>        | na                                                                                     | 0.080453 |
| 25   | <b>CCL4</b>                 | CCL4:chemokine (C-C motif) ligand 4                                                    | 0.082792 |
| 26   | <b>GAS2</b>                 | GAS2:growth arrest-specific 2                                                          | 0.08706  |
| 27   | <b>ENTPD1</b>               | ENTPD1:ectonucleoside triphosphate diphosphohydrolase 1                                | 0.088582 |
| 28   | <b>NR1I4</b>                | NR1I4:nuclear receptor subfamily 1, group I, member 4                                  | 0.092239 |
| 29   | <b>NFATC1</b>               | NFATC1:nuclear factor of activated T-cells, cytoplasmic, calcineurin-dependent 1       | 0.092277 |
| 30   | <b>RSAD2</b>                | RSAD2:radical S-adenosyl methionine domain containing 2                                | 0.094226 |
| 31   | <b>FGL2</b>                 | FGL2:fibrinogen-like 2                                                                 | 0.094473 |
| 32   | <b>COCH</b>                 | COCH:coagulation factor C homolog, cochlin (Limulus polyphemus)                        | 0.097937 |
| 33   | <b>PBX3</b>                 | PBX3:pre-B-cell leukemia transcription factor 3                                        | 0.098349 |
| 34   | <b>GPR65</b>                | GPR65:G protein-coupled receptor 65                                                    | 0.098633 |
| 35   | <b>EOMES</b>                | EOMES:eoimesodermin homolog (Xenopus laevis)                                           | 0.104715 |
| 36   | <b>LITAF</b>                | LITAF:lipopolysaccharide-induced TNF factor                                            | 0.108904 |
| 37   | <b>SERPINA3G</b>            | na                                                                                     | 0.110696 |
| 38   | <b>CCRL2</b>                | CCRL2:chemokine (C-C motif) receptor-like 2                                            | 0.112382 |
| 39   | <b>PTGER2</b>               | PTGER2:prostaglandin E receptor 2 (subtype EP2), 53kDa                                 | 0.114796 |
| 40   | <b>FYN</b>                  | FYN:FYN oncogene related to SRC, FGR, YES                                              | 0.115074 |
| 41   | <b>LAG3</b>                 | LAG3:lymphocyte-activation gene 3                                                      | 0.116046 |
| 42   | <b>PERP</b>                 | PERP:PERP, TP53 apoptosis effector                                                     | 0.120127 |
| 43   | <b>SPP1</b>                 | SPP1:secreted phosphoprotein 1 (osteopontin, bone sialoprotein I)                      | 0.121543 |
| 44   | <b>TNFRSF1B</b>             | TNFRSF1B:tumor necrosis factor receptor superfamily, member 1B                         | 0.122461 |
| 45   | <b>1300007C21RIK /// LO</b> | na                                                                                     | 0.122729 |
| 46   | <b>SFRS2IP</b>              | SFRS2IP:splicing factor, arginine/serine-rich 2, interacting protein                   | 0.125333 |
| 47   | <b>CD200</b>                | CD200:CD200 antigen                                                                    | 0.126373 |
| 48   | <b>CXCL10</b>               | CXCL10:chemokine (C-X-C motif) ligand 10                                               | 0.128178 |
| 49   | <b>H2-T23</b>               | na                                                                                     | 0.128194 |
| 50   | <b>1810035L17RIK</b>        | na                                                                                     | 0.129177 |
| 51   | <b>PENK1</b>                | na                                                                                     | 0.130642 |
| 52   | <b>IIGP1</b>                | na                                                                                     | 0.131724 |
| 53   | <b>AHR</b>                  | AHR:aryl hydrocarbon receptor                                                          | 0.132818 |
| 54   | <b>2010100O12RIK</b>        | na                                                                                     | 0.132825 |
| 55   | <b>D17H6S56E-5</b>          | na                                                                                     | 0.133011 |
| 56   | <b>RNF11</b>                | RNF11:ring finger protein 11                                                           | 0.133251 |
| 57   | <b>LYCAT</b>                | LYCAT:Lysocardiolipin acyltransferase                                                  | 0.135759 |
| 58   | <b>ADAM19</b>               | ADAM19:a disintegrin and metalloproteinase domain 19 (meltrin beta)                    | 0.137885 |
| 59   | <b>CD9</b>                  | CD9:CD9 antigen (p24)                                                                  | 0.140893 |
| 60   | <b>ART3</b>                 | ART3:ADP-ribosyltransferase 3                                                          | 0.142473 |
| 61   | <b>PGLYRP1</b>              | PGLYRP1:peptidoglycan recognition protein 1                                            | 0.14278  |
| 62   | <b>GM1066</b>               | na                                                                                     | 0.143157 |
| 63   | <b>IFIT1</b>                | IFIT1:interferon-induced protein with tetratricopeptide repeats 1                      | 0.143255 |
| 64   | <b>TCRB-J /// LOC381765</b> | na                                                                                     | 0.14627  |
| 65   | <b>BC039093</b>             | na                                                                                     | 0.146872 |
| 66   | <b>TNFRSF7</b>              | TNFRSF7:tumor necrosis factor receptor superfamily, member 7                           | 0.147088 |
| 67   | <b>GZMK</b>                 | GZMK:granzyme K (serine protease, granzyme 3; tryptase II)                             | 0.14802  |
| 68   | <b>MLLT3</b>                | MLLT3:myeloid/lymphoid or mixed-lineage leukemia (trithorax homolog, Drosophila)       | 0.149096 |
| 69   | <b>RGS16</b>                | RGS16:regulator of G-protein signalling 16                                             | 0.151003 |
| 70   | <b>IFIT3</b>                | IFIT3:interferon-induced protein with tetratricopeptide repeats 3                      | 0.151186 |
| 71   | <b>CBX6</b>                 | CBX6:chromobox homolog 6                                                               | 0.152989 |
| 72   | <b>ITM2C</b>                | ITM2C:integral membrane protein 2C                                                     | 0.154359 |
| 73   | <b>ALCAM</b>                | ALCAM:activated leukocyte cell adhesion molecule                                       | 0.155478 |
| 74   | <b>BCL2A1A /// BCL2A1B</b>  | na                                                                                     | 0.1556   |
| 75   | <b>C330007P06RIK</b>        | na                                                                                     | 0.157374 |
| 76   | <b>IRF8</b>                 | IRF8:interferon regulatory factor 8 /// interferon regulatory factor 8                 | 0.158911 |
| 77   | <b>GP49A /// LILRB4</b>     | na                                                                                     | 0.160754 |
| 78   | <b>TRIM17 /// HIST3H2A</b>  | na                                                                                     | 0.161027 |
| 79   | <b>IFI204</b>               | na                                                                                     | 0.161116 |
| 80   | <b>RBL2</b>                 | RBL2:retinoblastoma-like 2 (p130)                                                      | 0.16141  |
| 81   | <b>ITGAV</b>                | ITGAV:integrin, alpha V (vitronectin receptor, alpha polypeptide, antigen CD51)        | 0.161888 |
| 82   | <b>CASP1</b>                | CASP1:caspase 1, apoptosis-related cysteine protease (interleukin 1, beta, convertase) | 0.162062 |
| 83   | <b>CTLA4</b>                | CTLA4:cytotoxic T-lymphocyte-associated protein 4                                      | 0.162364 |
| 84   | <b>EIF3S1</b>               | EIF3S1:eukaryotic translation initiation factor 3, subunit 1 alpha, 35kDa              | 0.162971 |
| 85   | <b>SPG21</b>                | SPG21:spastic paraplegia 21 (autosomal recessive, Mast syndrome)                       | 0.164281 |
| 86   | <b>CAPZB</b>                | CAPZB:capping protein (actin filament) muscle Z-line, beta                             | 0.166393 |
| 87   | <b>ACADL</b>                | ACADL:acyl-Coenzyme A dehydrogenase, long chain                                        | 0.166683 |
| 88   | <b>MX1</b>                  | MX1:myxovirus (influenza virus) resistance 1, interferon-inducible protein p78 (mouse) | 0.168045 |
| 89   | <b>NDUFA5</b>               | NDUFA5:NADH dehydrogenase (ubiquinone) 1 alpha subcomplex, 5, 13kDa                    | 0.169597 |
| 90   | <b>RASA1</b>                | RASA1:RAS p21 protein activator (GTPase activating protein) 1                          | 0.170977 |
| 91   | <b>SERPINB6A</b>            | na                                                                                     | 0.172751 |
| 92   | <b>RCN1</b>                 | RCN1:reticulocalbin 1, EF-hand calcium binding domain                                  | 0.175488 |
| 93   | <b>TNFSF11</b>              | TNFSF11:tumor necrosis factor (ligand) superfamily, member 11                          | 0.175657 |
| 94   | <b>HCCS</b>                 | HCCS:hologochrom c synthase (cytochrome c heme-lyase)                                  | 0.176435 |
| 95   | <b>CCR5</b>                 | CCR5:chemokine (C-C motif) receptor 5                                                  | 0.177572 |
| 96   | <b>2310015N07RIK</b>        | na                                                                                     | 0.177582 |
| 97   | <b>583047E12RIK</b>         | na                                                                                     | 0.17964  |
| 98   | <b>CPEB2</b>                | CPEB2:cytoplasmic polyadenylation element binding protein 2                            | 0.179894 |
| 99   | <b>NUCB1</b>                | NUCB1:nucleobindin 1                                                                   | 0.179917 |
