# Supplementary material
Source: PubMed Central journal article supplement (PMC2605166)
Supplement: NIHMS75276-supplement-2.pdf [file NIHMS75276-supplement-2.pdf]

**Supplemental Table 2 Flow Cytometry Antibodies Used**

| <u>Molecule</u> | <u>Clone</u>              |
|-----------------|---------------------------|
| CD8             | 53.6-7                    |
| CD44            | IM7                       |
| PD-1            | RMP1-30                   |
| LAG-3           | C9B7W                     |
| CD160           | CNX46-3                   |
| CD244/2B4       | 2B4 and ebio244F4         |
| CTLA-4          | Uc10-4F10-11 and UC10-4B9 |
| PIR-B           | 6C1                       |
| GP49            | H1.1                      |
| KLRG1           | 2F1                       |
| NKG2A           | 16a11                     |
| NKG2D           | CX5                       |
| BTLA            | 6F7                       |
| CD62L           | Mel-14                    |
| CD127           | A7R34                     |
| TNF             | MP6-XT22                  |
| IFN-g           | XMG1.2                    |
| CD107a          | 1D4B                      |
| Ki67            | B56                       |
| CD48            | BCM1                      |
