# Supplementary material
Source: PubMed Central journal article supplement (PMC2605166)
Supplement: NIHMS75276-supplement-3.pdf [file NIHMS75276-supplement-3.pdf]

Supplemental Table 3. Blackburn et.al.

| <b>LCMV H2b CD8 peptides</b> | <b>Included in peptide pool</b> |
|------------------------------|---------------------------------|
| <b>GP33-41</b>               | ✓                               |
| <b>GP44-51</b>               | ✓                               |
| <b>GP70-77</b>               | ✓                               |
| <b>GP92-101</b>              | ✓                               |
| <b>GP118-125</b>             | ✓                               |
| GP166-173                    |                                 |
| <b>GP221-228</b>             | ✓                               |
| <b>GP276-286</b>             | ✓                               |
| GP365-372                    |                                 |
| <b>L156-163</b>              | ✓                               |
| L313-320                     |                                 |
| <b>L338-346</b>              | ✓                               |
| <b>L349-357</b>              | ✓                               |
| <b>L455-463</b>              | ✓                               |
| L663-671                     |                                 |
| <b>L689-697</b>              | ✓                               |
| L743-751                     |                                 |
| <b>L775-782</b>              | ✓                               |
| L1189-1196                   |                                 |
| L1302-1310                   |                                 |
| L1369-1377                   |                                 |
| <b>L1428-1435</b>            | ✓                               |
| <b>L1878-1885</b>            | ✓                               |
| <b>L2062-2069</b>            | ✓                               |
| <b>NP165-175</b>             | ✓                               |
| <b>NP205-212</b>             | ✓                               |
| <b>NP238-248</b>             | ✓                               |
| <b>NP396-404</b>             | ✓                               |
|                              |                                 |
