# Supplementary material
Source: PubMed Central journal article supplement (PMC2605166)
Supplement: NIHMS75276-supplement-4.pdf [file NIHMS75276-supplement-4.pdf]

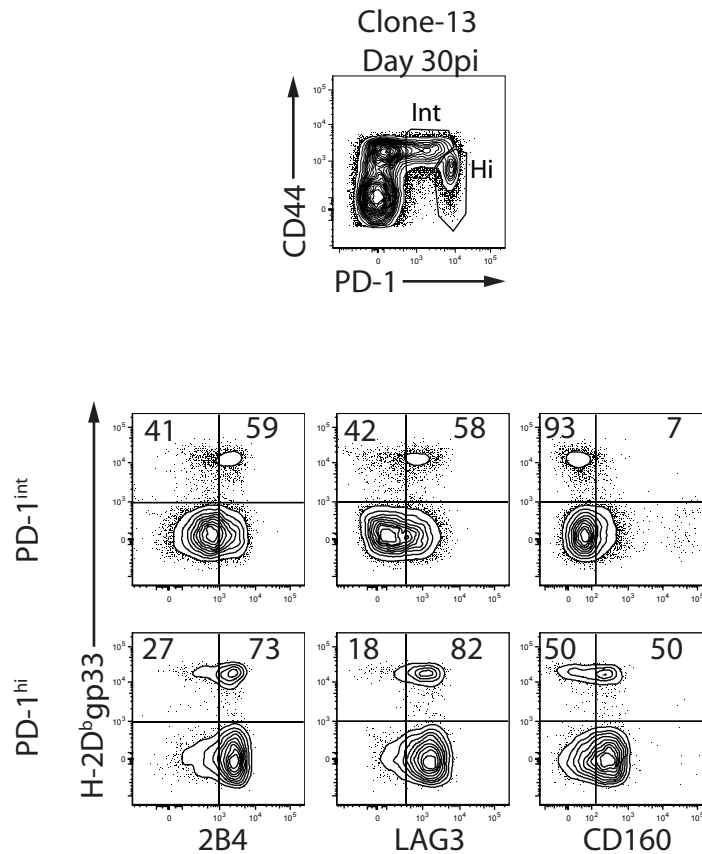

**Supplemental Figure 1. Exhausted CD8<sup>+</sup> T cell subsets have distinct inhibitory receptor co-expression profiles.** (a) H-2D<sup>b</sup>gp33<sup>+</sup> CD8<sup>+</sup> splenocytes from LCMV clone 13 infected mice (d30 p.i.) co-stained with anti-PD-1 and for other inhibitory receptors. The total CD8<sup>+</sup> T cell population was used to gate on PD-1<sup>Hi</sup>CD44<sup>Int</sup> and PD-1<sup>Int</sup>CD44<sup>Hi</sup> populations (top). Numbers indicate the percent of tetramer<sup>+</sup> CD8<sup>+</sup> T cells in the indicated quadrant (bottom). Data are representative of 3 independent experiments with 3-5 mice per experiment.
