# Supplementary material
Source: PubMed Central journal article supplement (PMC2605166)
Supplement: NIHMS75276-supplement-5.pdf [file NIHMS75276-supplement-5.pdf]

a

Day 30

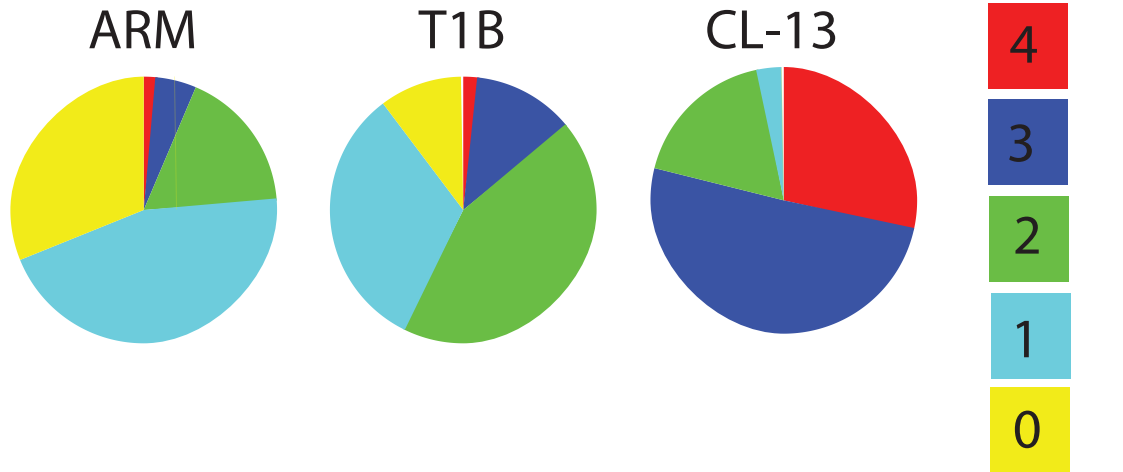

b

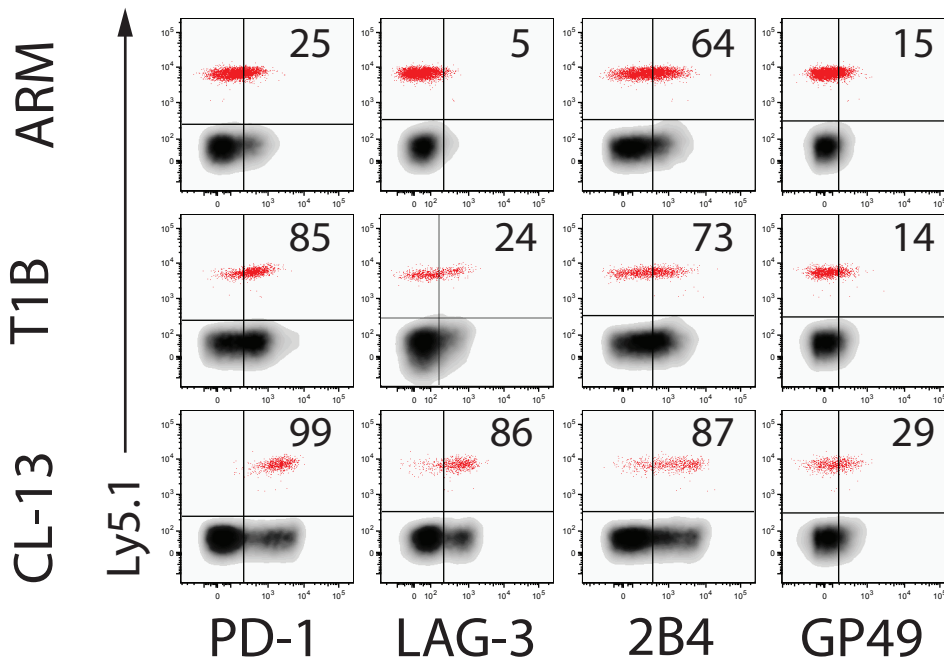

**Supplemental Figure 2. Concurrent expression of multiple inhibitory receptors is not dependent on TCR diversity.**

The simultaneous expression of multiple inhibitory receptors (PD-1, LAG-3, 2B4, and GP49) on P14 Ly5.1<sup>+</sup> H-2D<sup>b</sup>gp33<sup>+</sup> CD8<sup>+</sup> T cells from three infection groups was examined on d30 p.i. using Boolean gating analysis. (a) Individual populations were grouped according to the total number of inhibitory receptors expressed. (b) Single inhibitory receptor staining (PD-1, LAG-3, 2B4, and GP49) on P14 Ly5.1<sup>+</sup> H-2D<sup>b</sup>gp33<sup>+</sup> CD8<sup>+</sup> T cells from three infection groups examined on d30 p.i. Numbers are the percent of Ly5.1<sup>+</sup> P14 cells expressing the indicated receptor. Data are representative of three independent experiments with 3-5 mice per experiment.
