# Supplementary material
Source: PubMed Central journal article supplement (PMC2605166)
Supplement: NIHMS75276-supplement-6.pdf [file NIHMS75276-supplement-6.pdf]

Day 30

ARM

T1B

CI-13

$\alpha$ -CD4  
CI-13

Inhibitory  
receptors  
expressed

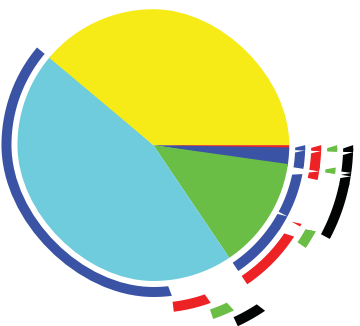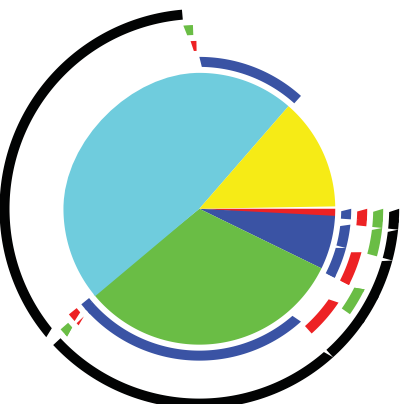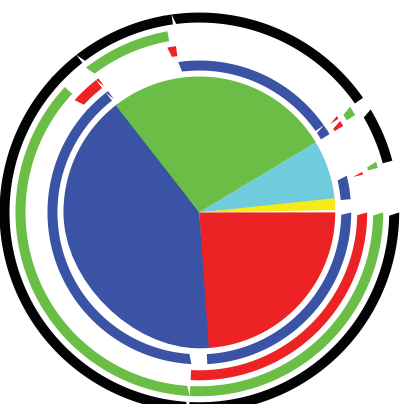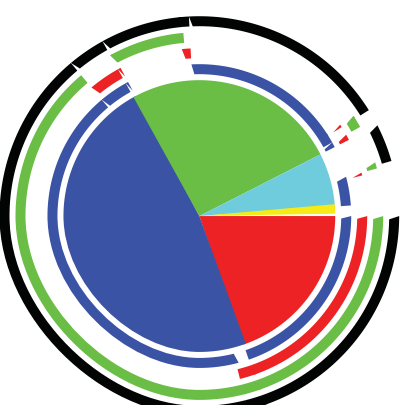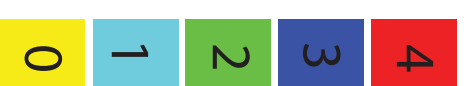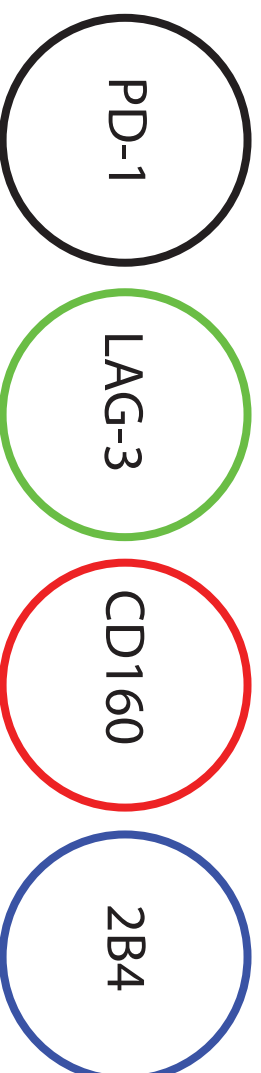

**Supplemental Figure 3. Pattern of co-expression of multiple inhibitory receptors.** The simultaneous expression of multiple inhibitory receptors (PD-1, LAG-3, 2B4, and CD160) on H-2D<sup>b</sup>gp33<sup>+</sup> CD8<sup>+</sup> splenocytes from the four infection groups was examined on d30 p.i. using Boolean gating analysis as in Fig. 4. The outer rings represent a single inhibitory receptor and denote the population on which it is expressed. Data are representative of three independent experiments with 4-5 mice per experiment.
