# Supplementary material
Source: PubMed Central journal article supplement (PMC2605166)
Supplement: NIHMS75276-supplement-8.pdf [file NIHMS75276-supplement-8.pdf]

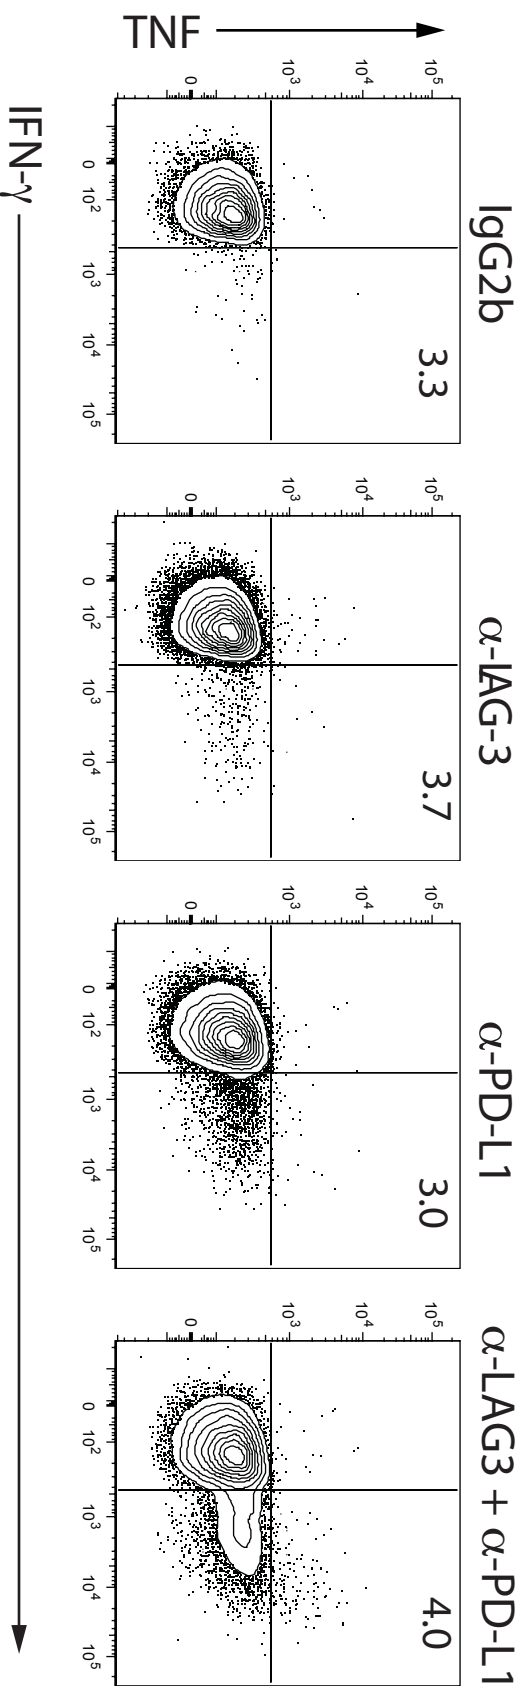

**Supplemental Figure 5. IFN- $\gamma$  and TNF co-production in vivo PD-L1, LAG-3 or PD-L1 plus LAG-3 blockade.** Dual IFN- $\alpha$  and TNF co-production was assessed by ICS following 2 weeks of in vivo inhibitory receptor blockade. Staining was performed on the same populations as shown in **Fig. 6B**. Data are representative of three independent experiments with 5-7 mice per experiment.
