# Supplementary material
Source: PubMed Central journal article supplement (PMC2605166)
Supplement: NIHMS75276-supplement-9.pdf [file NIHMS75276-supplement-9.pdf]

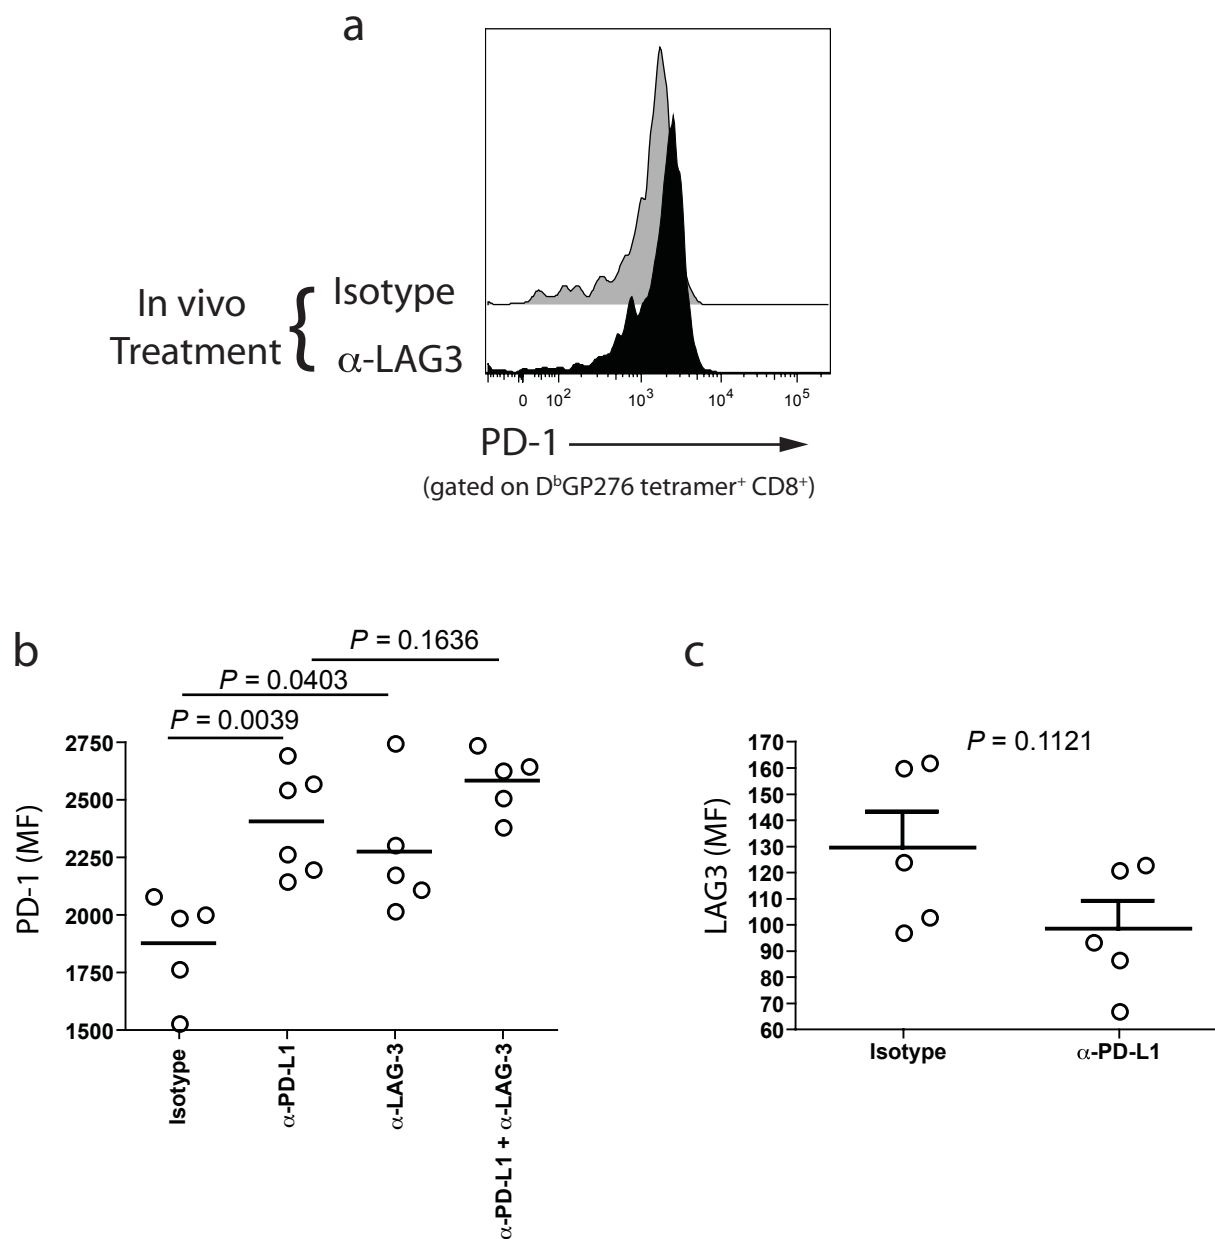

**Supplemental Figure 6. Change in inhibitory receptor expression following *in vivo* inhibitory receptor blockade.** (a) PD-1 expression on H-2D<sup>b</sup>gp276<sup>+</sup> CD8<sup>+</sup> T cells from mice treated with anti-LAG-3 or an isotype control. (b) PD-1 expression (expressed as mean fluorescence intensity) on H-2D<sup>b</sup>gp276<sup>+</sup> CD8<sup>+</sup> T cells from mice treated with anti-LAG-3, anti-PD-L1, anti-LAG-3 plus anti-PD-L1, or an isotype control. (c) LAG-3 expression (expressed as mean fluorescence intensity) on H-2D<sup>b</sup>gp276<sup>+</sup> CD8<sup>+</sup> T cells from mice treated with anti-PD-L1 or an isotype control. Expression of LAG-3 could not be assessed following LAG-3 blockade since the blocking and detecting antibody are the same. Data are representative of three independent experiments with 5-7 mice per experiment.
